# Supplementary material for: Interannual Variability and Trends of Combustion Aerosol and Dust in Major Continental Outflows Revealed by MODIS Retrievals and CAM5 Simulations During 2003–2017
Source: Copernicus journal article supplement (doi:10.5194/acp-2019-621), 2019-09-03
Supplement: Supplementary file 1 [file acp-2019-621-supplement.pdf]

1  
2  
3  
4  
5  
6  
7  
8  
9  
10  
11  
12  
13  
14  
15

**Supplementary Online Material**

**Interannual Variability and Trends of Combustion Aerosol and Dust in Major  
Continental Outflows Revealed by MODIS Retrievals and CAM5 Simulations During  
2003 – 2017**

Hongbin Yu, Yang Yang, Hailong Wang, Qian Tan, Mian Chin, Robert C. Levy, Lorraine A.  
Remer, Steven J. Smith, Tianle Yuan, Yingxi Shi

submitted to the *Atmospheric Chemistry and Physics*

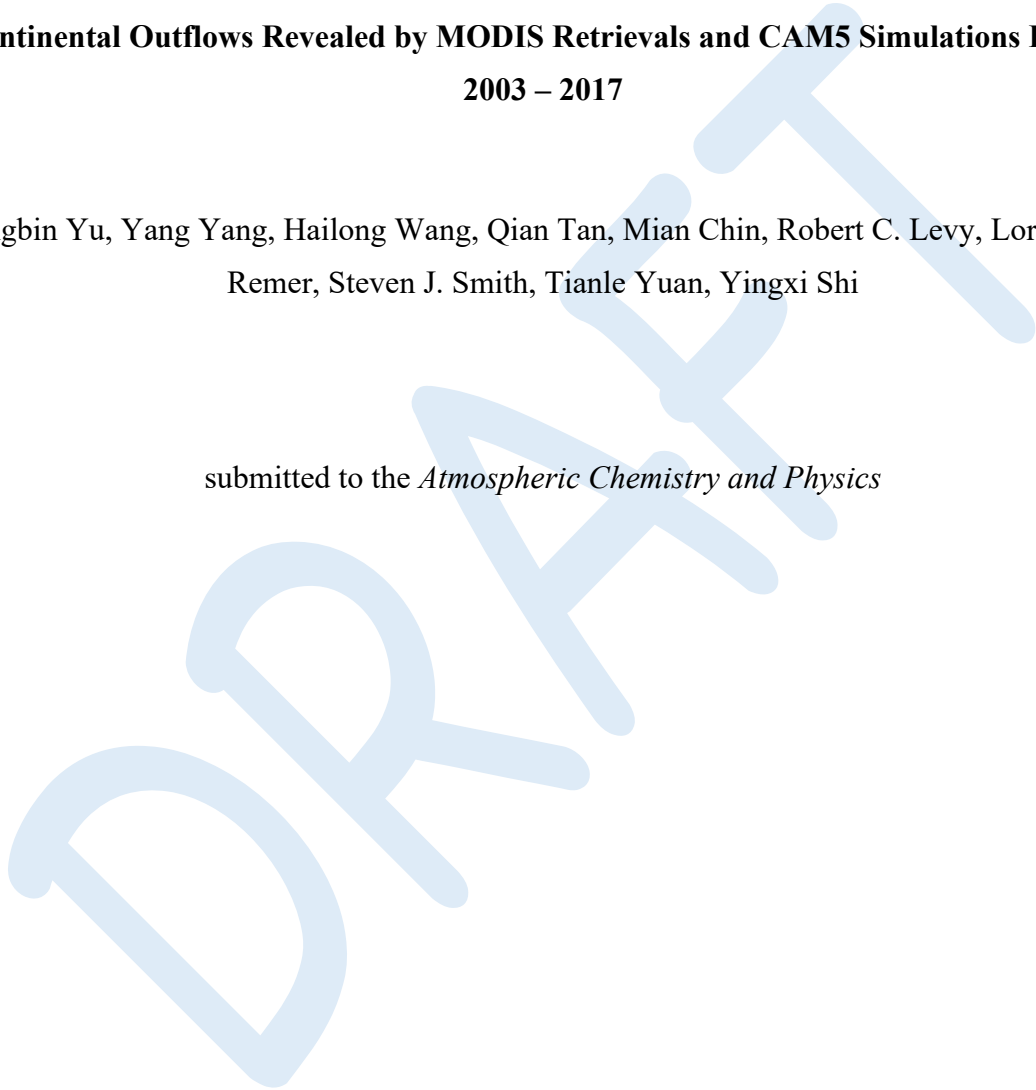

16  
17  
18

Figure S1

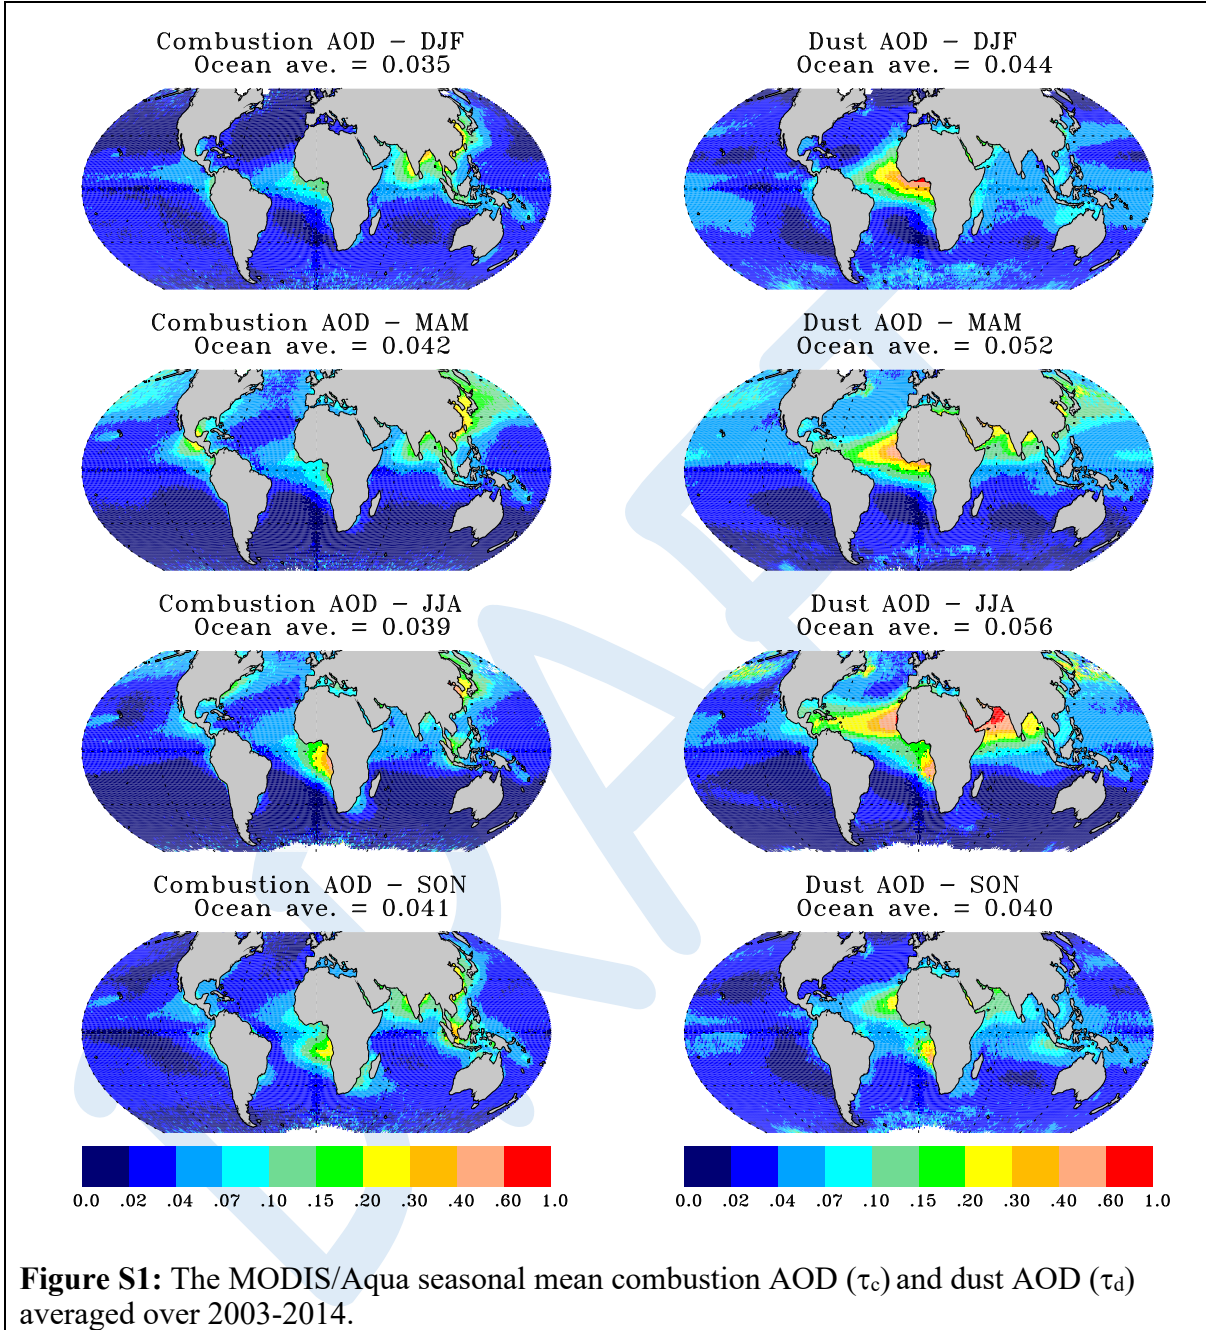

Figure S1: The MODIS/Aqua seasonal mean combustion AOD ( $\tau_c$ ) and dust AOD ( $\tau_d$ ) averaged over 2003-2014.

19  
20

21 **Figure S2**  
22

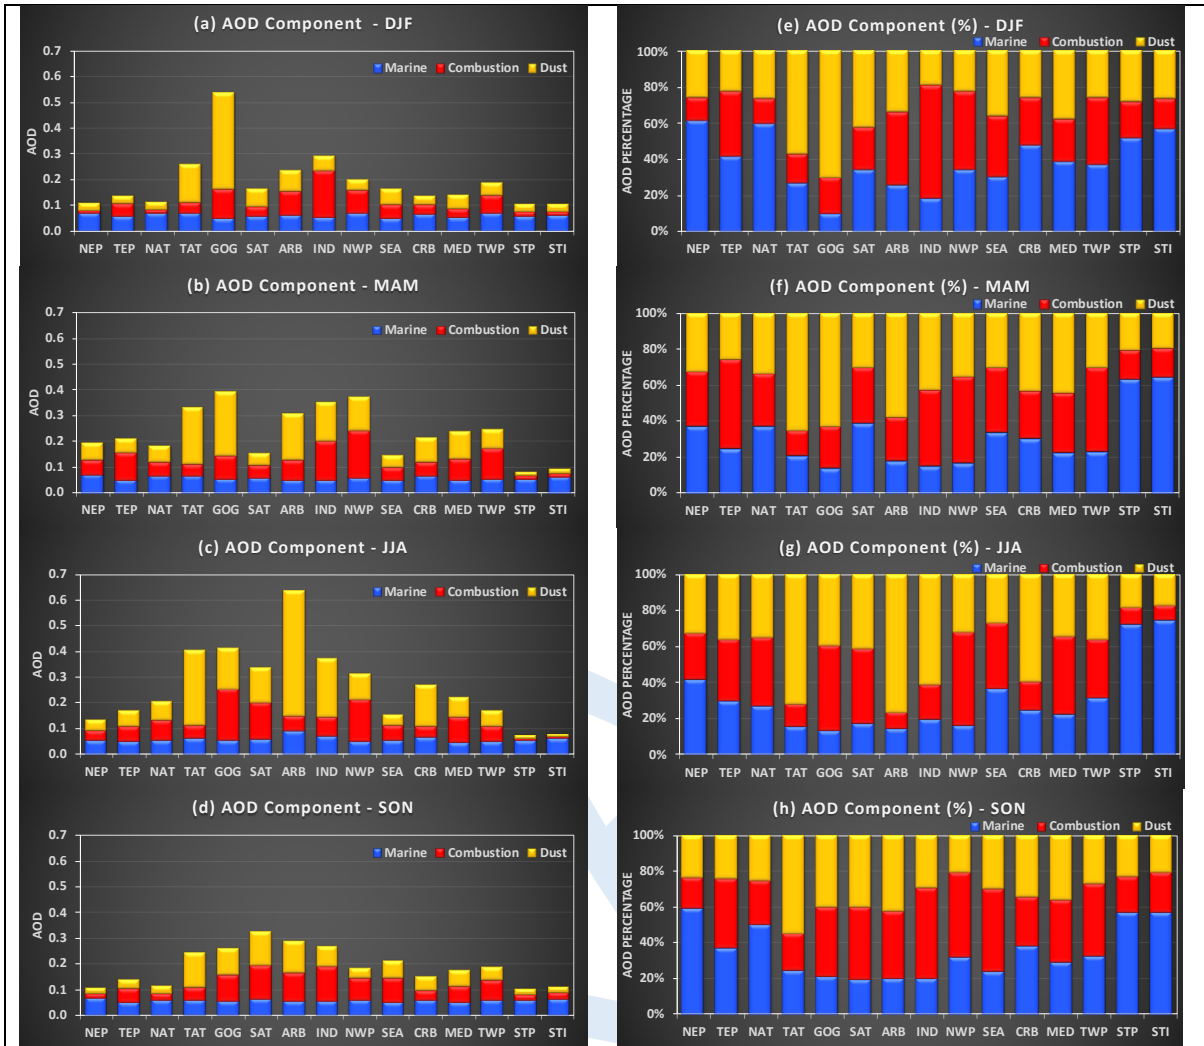

**Figure S2:** Aerosol component climatology with seasonal distinctions in the 15 regions as derived from 2003-2017 MODIS Aqua observations: (a - d) for magnitude of component AOD, and (e - g) for percentage of component AOD.

23  
24  
25

26 Figure S3

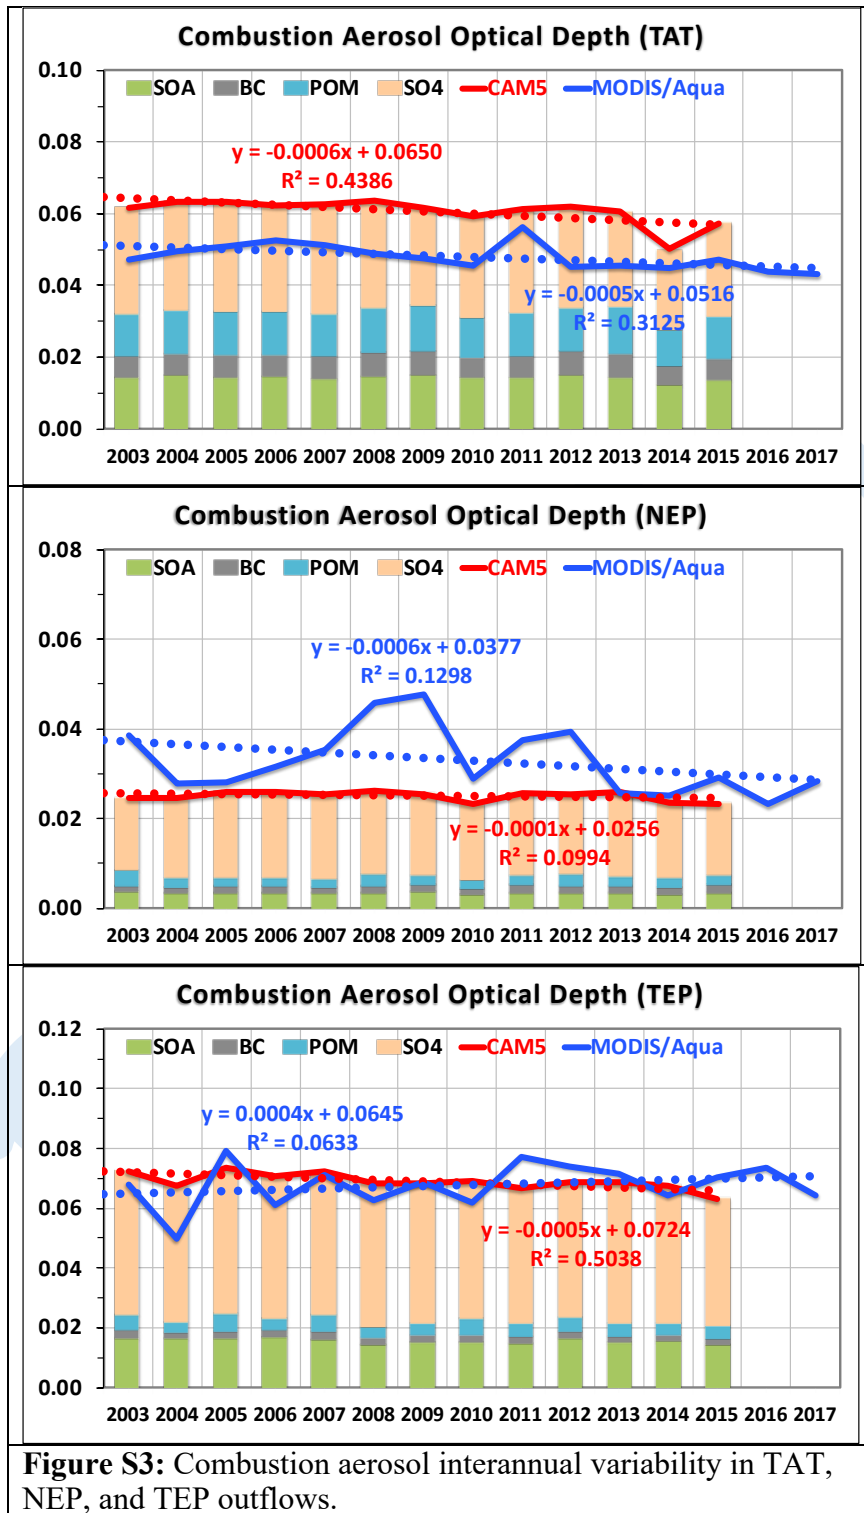

27  
28  
29  
30

Figure S4

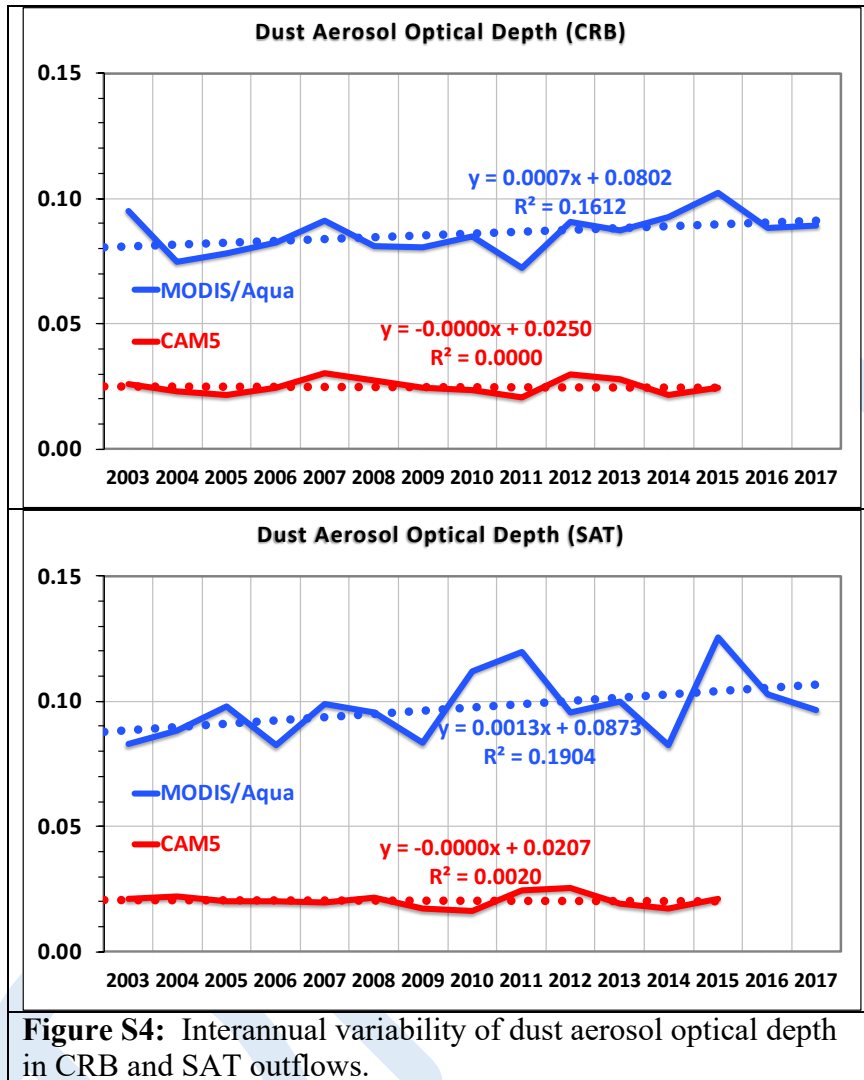

Figure S4: Interannual variability of dust aerosol optical depth in CRB and SAT outflows.

31  
32
